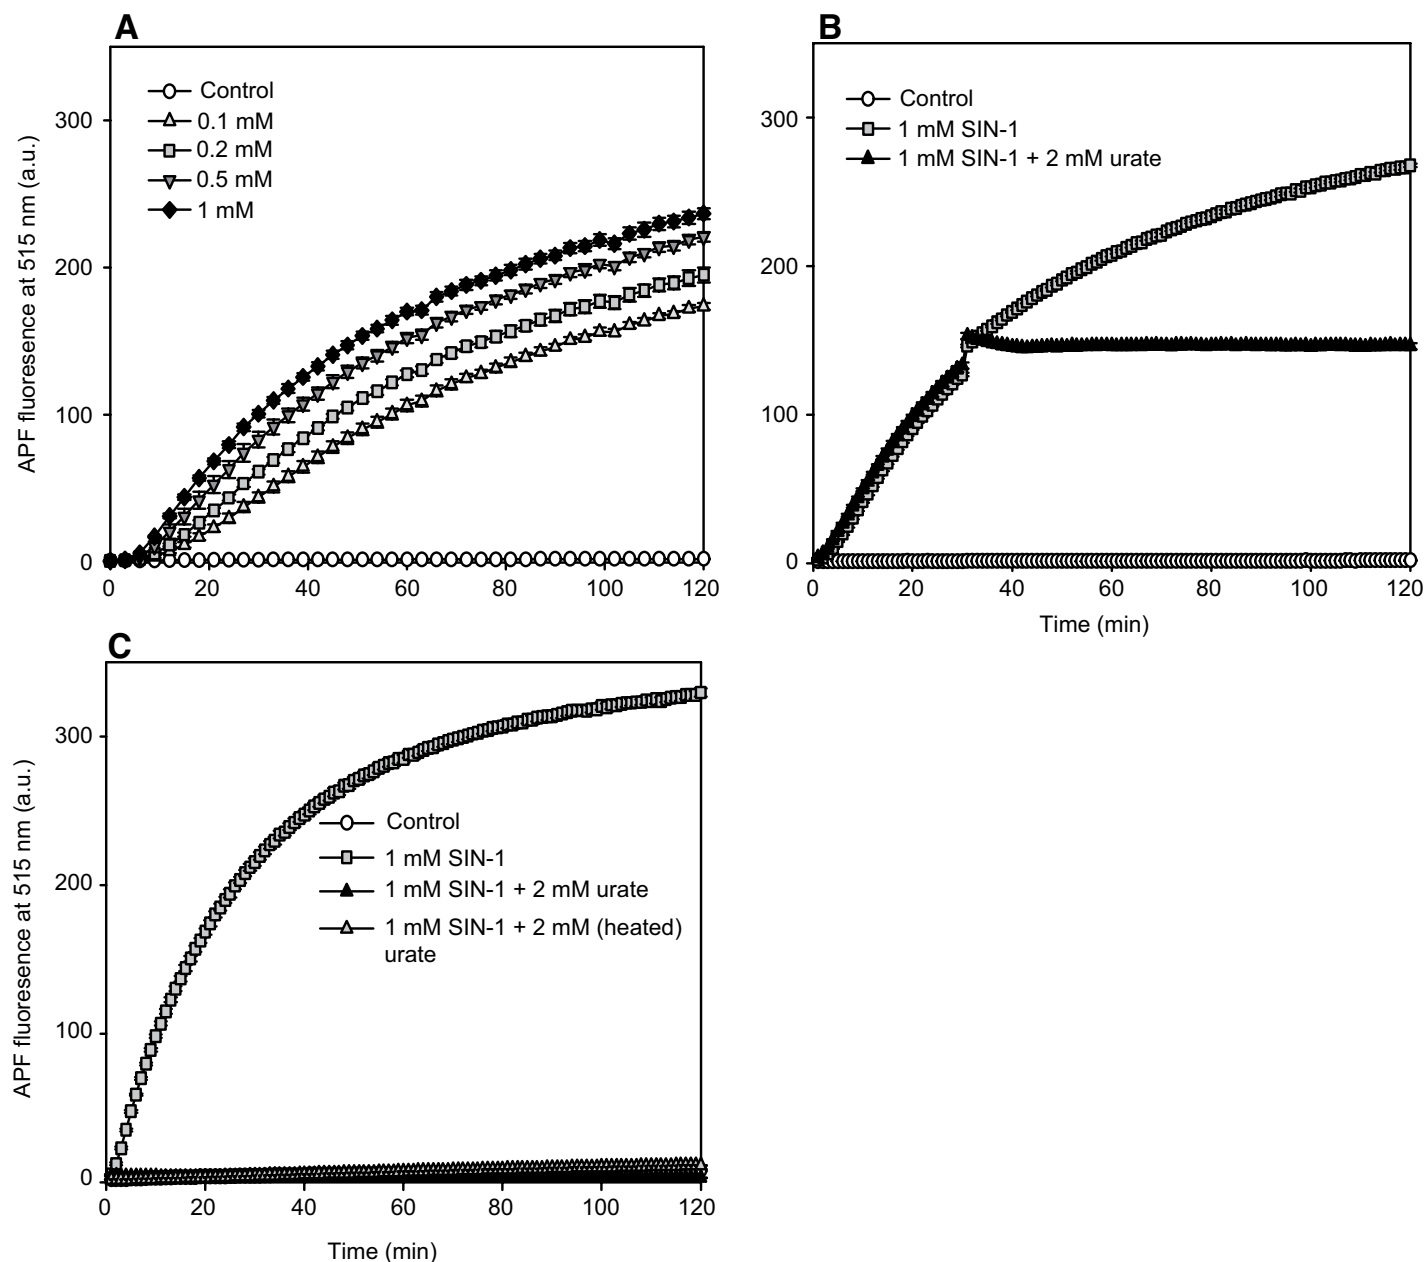

**Fig. S1.** The suitability of aminophenyl fluorescein (APF) for detection of peroxynitrite ( $\text{ONOO}^-$ ). (A) Fluorescence kinetics after addition of various concentrations of the  $\text{ONOO}^-$  donor SIN-1 to APF ( $10 \mu\text{mol l}^{-1}$  in relaxing solution; see text). (B) Fluorescence kinetics of APF after addition of  $1 \text{ mmol l}^{-1}$  SIN-1 in the presence or absence of  $2 \text{ mmol l}^{-1}$  urate (a peroxynitrite scavenger). The urate was added 30 min after SIN-1, such that previously activated APF remained fluorescent. (C) Fluorescence kinetics of APF after addition of  $1 \text{ mmol l}^{-1}$  SIN-1 in the presence or absence of  $2 \text{ mmol l}^{-1}$  freshly prepared or heat-treated urate. Values are means  $\pm$  s.e.m. ( $N=4$  independent experiments).
